# Supplementary material for: Inhaled nitric oxide therapy and risk of renal dysfunction: a systematic review and meta-analysis of randomized trials
Source: Springer Nature journal article supplement (doi:10.1186/s13054-015-0880-2), 2015-03-19
Supplement: MOESM1 [file 9780372]

**Table S1. Details of the search strategy and results (Search date: September 25, 2014)**

| <b>Step</b> | <b>Database and search items</b>                                                          | <b>No. of citations</b> |
|-------------|-------------------------------------------------------------------------------------------|-------------------------|
|             | <b>MEDLINE via the NCBI Entrez system</b>                                                 |                         |
| #1          | "inhaled nitric oxide" AND "randomized controlled trial"                                  | 195                     |
| #2          | "Nitric Oxide/therapeutic use"[Mesh] AND "Randomized Controlled Trial" [Publication Type] | 211                     |
| #3          | #1 OR #2                                                                                  | 240                     |
|             | <b>Cochrane Central Register of Controlled Trials</b>                                     |                         |
| #4          | "inhaled nitric oxide" AND "randomized controlled trial"                                  | 56                      |
