# Supplementary material for: Inhaled nitric oxide therapy and risk of renal dysfunction: a systematic review and meta-analysis of randomized trials
Source: Springer Nature journal article supplement (doi:10.1186/s13054-015-0880-2), 2015-03-19
Supplement: MOESM2 [file 9780372]

## References

1. Dellinger RP, Zimmerman JL, Taylor RW, Straube RC, Hauser DL, Criner GJ, Davis K, Jr., Hyers TM, Papadakos P: **Effects of inhaled nitric oxide in patients with acute respiratory distress syndrome: results of a randomized phase II trial. Inhaled Nitric Oxide in ARDS Study Group.** *Crit Care Med* 1998, **26**:15-23.
2. Lundin S, Mang H, Smithies M, Stenqvist O, Frostell C: **Inhalation of nitric oxide in acute lung injury: results of a European multicentre study. The European Study Group of Inhaled Nitric Oxide.** *Intensive Care Med* 1999, **25**:911-919.
3. Kinsella JP, Walsh WF, Bose CL, Gerstmann DR, Labella JJ, Sardesai S, Walsh-Sukys MC, McCaffrey MJ, Cornfield DN, Bhutani VK *et al*: **Inhaled nitric oxide in premature neonates with severe hypoxaemic respiratory failure: a randomised controlled trial.** *Lancet* 1999, **354**:1061-1065.
4. Payen D, Vallet B, Group d'étude du NO dans l'ARDS: **Results of the French prospective multicentric randomized double-blind placebo-controlled trial on inhaled nitric oxide (NO) in ARDS [Abstract].** *Intensive Care Med* 1999, **25**:166.
5. Taylor RW, Zimmerman JL, Dellinger RP, Straube RC, Criner GJ, Davis K, Jr., Kelly KM, Smith TC, Small RJ: **Low-dose inhaled nitric oxide in patients with acute lung injury: a randomized controlled trial.** *JAMA* 2004, **291**:1603-1609.
6. Perrin G, Roch A, Michelet P, Reynaud-Gaubert M, Thomas P, Doddoli C, Auffray JP: **Inhaled nitric oxide does not prevent pulmonary edema after lung transplantation measured by lung water content: a randomized clinical study.** *Chest* 2006, **129**:1024-1030.
7. Potapov E, Meyer D, Swaminathan M, Ramsay M, El Banayosy A, Diehl C, Veynovich B, Gregoric ID, Kukucka M, Gromann TW *et al*: **Inhaled nitric oxide after left ventricular assist device implantation: a prospective, randomized, double-blind, multicenter, placebo-controlled trial.** *J Heart Lung Transplant* 2011, **30**:870-878.
8. Fernandes JL, Sampaio RO, Brandao CM, Accorsi TA, Cardoso LF, Spina GS, Tarasoutchi F, Pomerantzeff P, Auler JO, Jr., Grinberg M: **Comparison of inhaled nitric oxide versus oxygen on hemodynamics in patients with mitral stenosis and severe pulmonary hypertension after mitral valve surgery.** *Am J Cardiol* 2011, **107**:1040-1045.
9. Lang JD, Jr., Smith AB, Brandon A, Bradley KM, Liu Y, Li W, Crowe DR, Jhala NC, Cross RC, Frenette L *et al*: **A randomized clinical trial testing the anti-inflammatory effects of preemptive inhaled nitric oxide in human liver transplantation.** *PLoS One* 2014, **9**:e86053.

10. Trzeciak S, Glaspey LJ, Dellinger RP, Durflinger P, Anderson K, Dezfulian C, Roberts BW, Chansky ME, Parrillo JE, Hollenberg SM:  
**Randomized Controlled Trial of Inhaled Nitric Oxide for the Treatment of Microcirculatory Dysfunction in Patients With Sepsis.** *Crit Care Med* 2014, **42**:2482-2492.
